# Supplementary material
Source: publisher figshare collection journal article supplement (https://karger.figshare.com/articles/dataset/_/5122576)
Supplement: Supplementary file 1 [file 1]

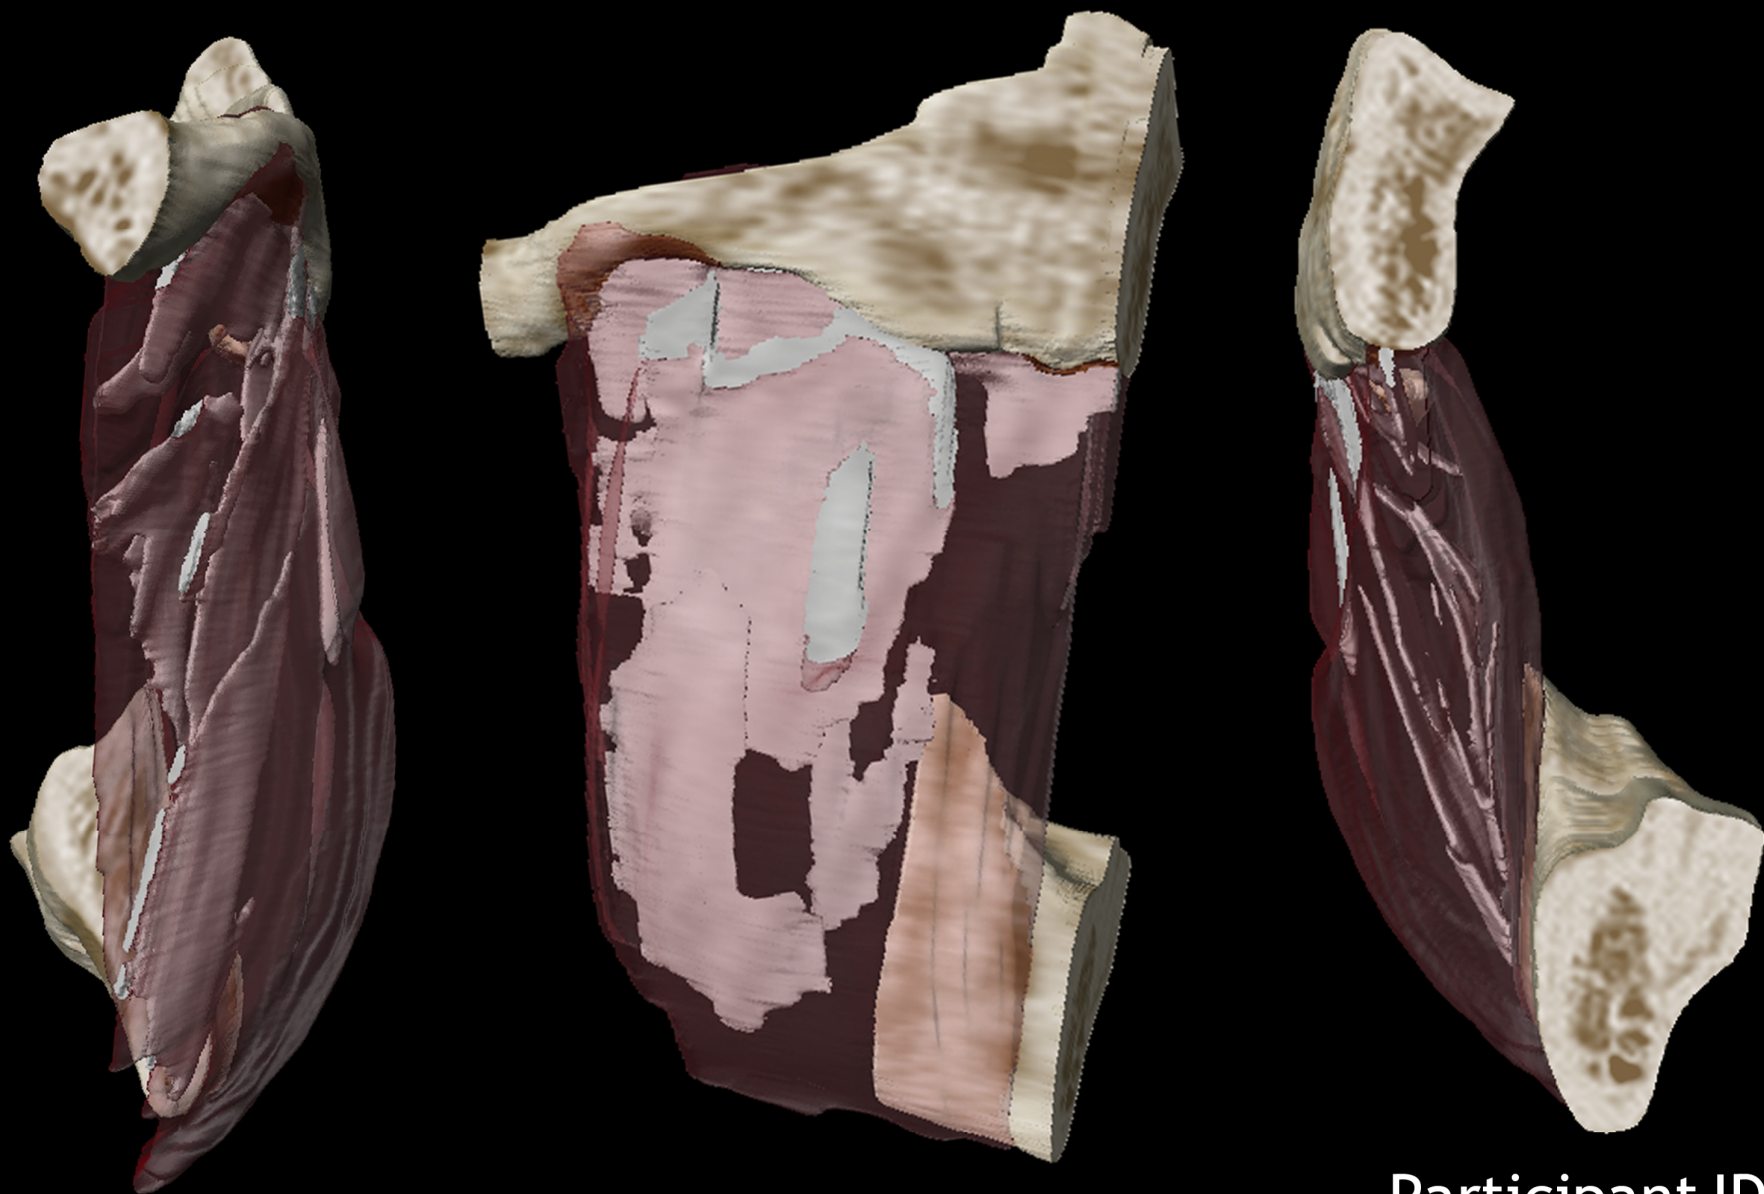

Participant ID: #1  
Age: 26.6 years  
Male

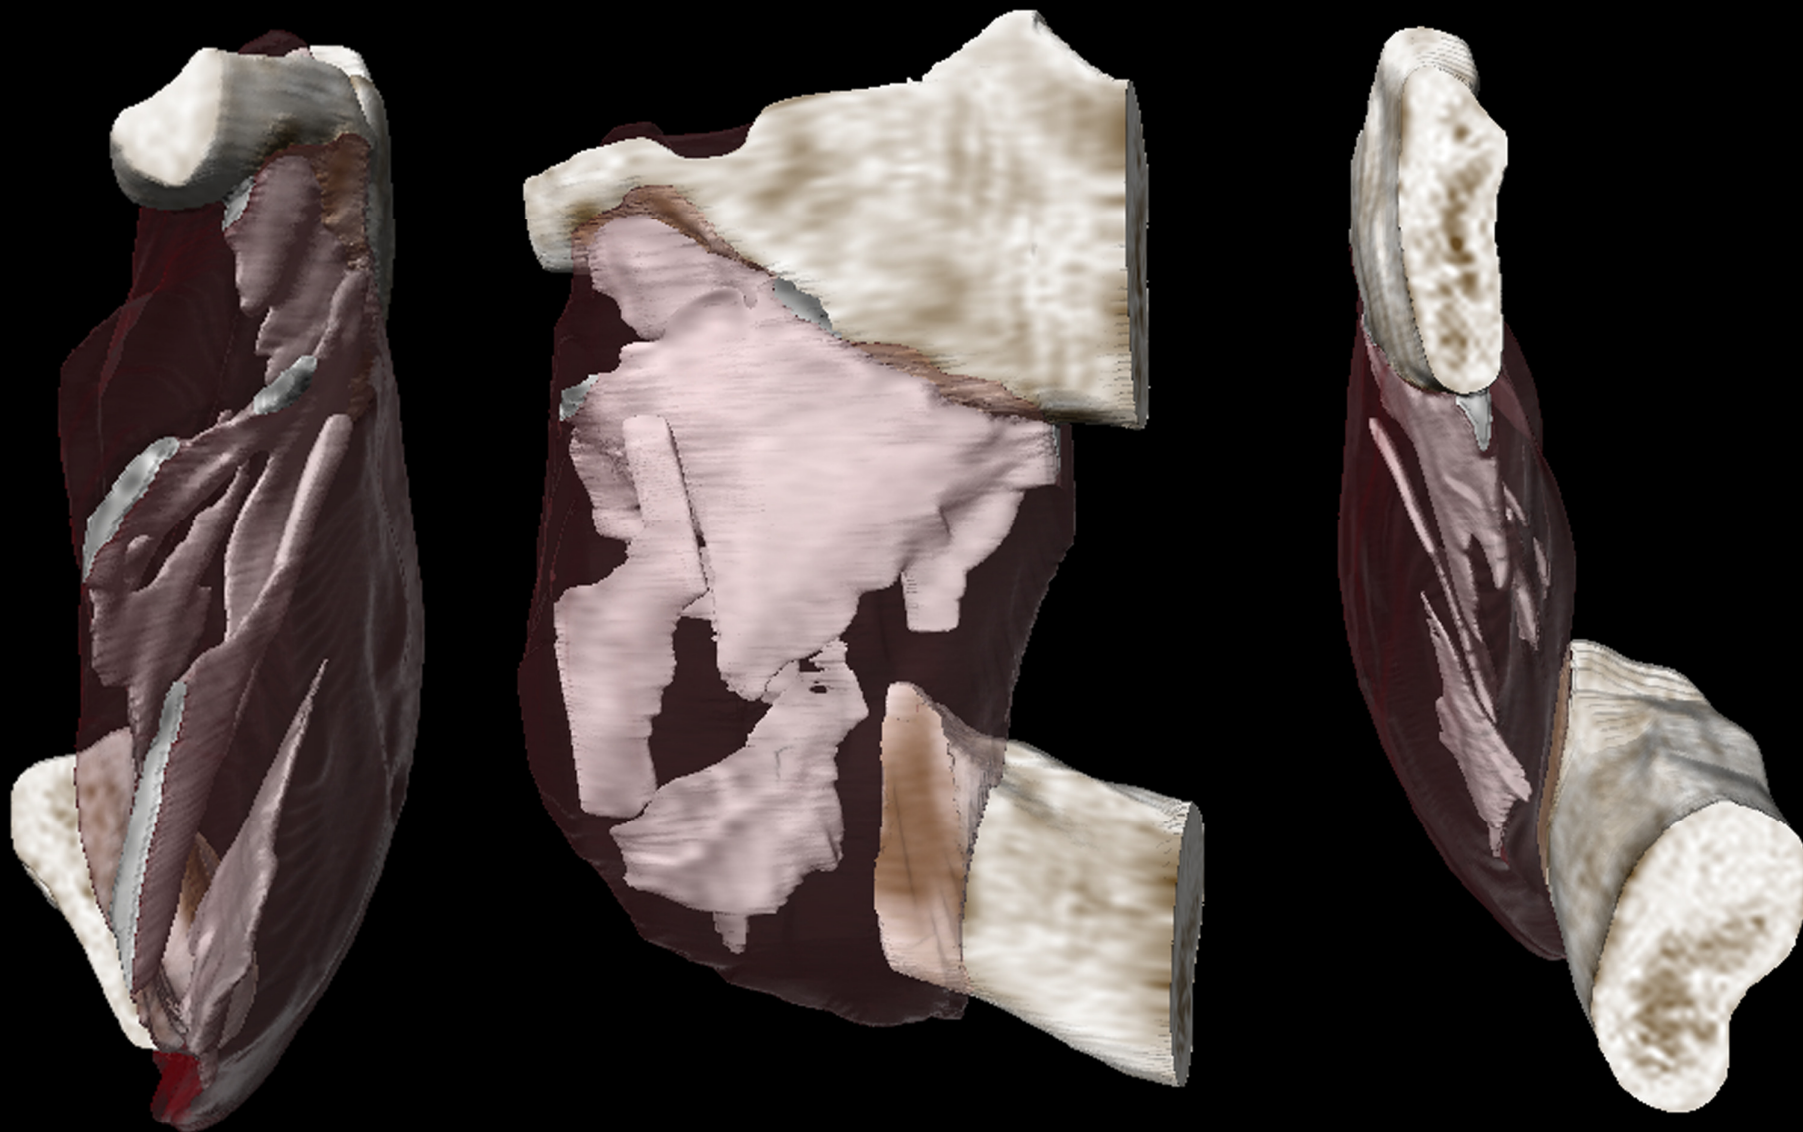

Participant ID: #2  
Age: 25.7 years  
Male

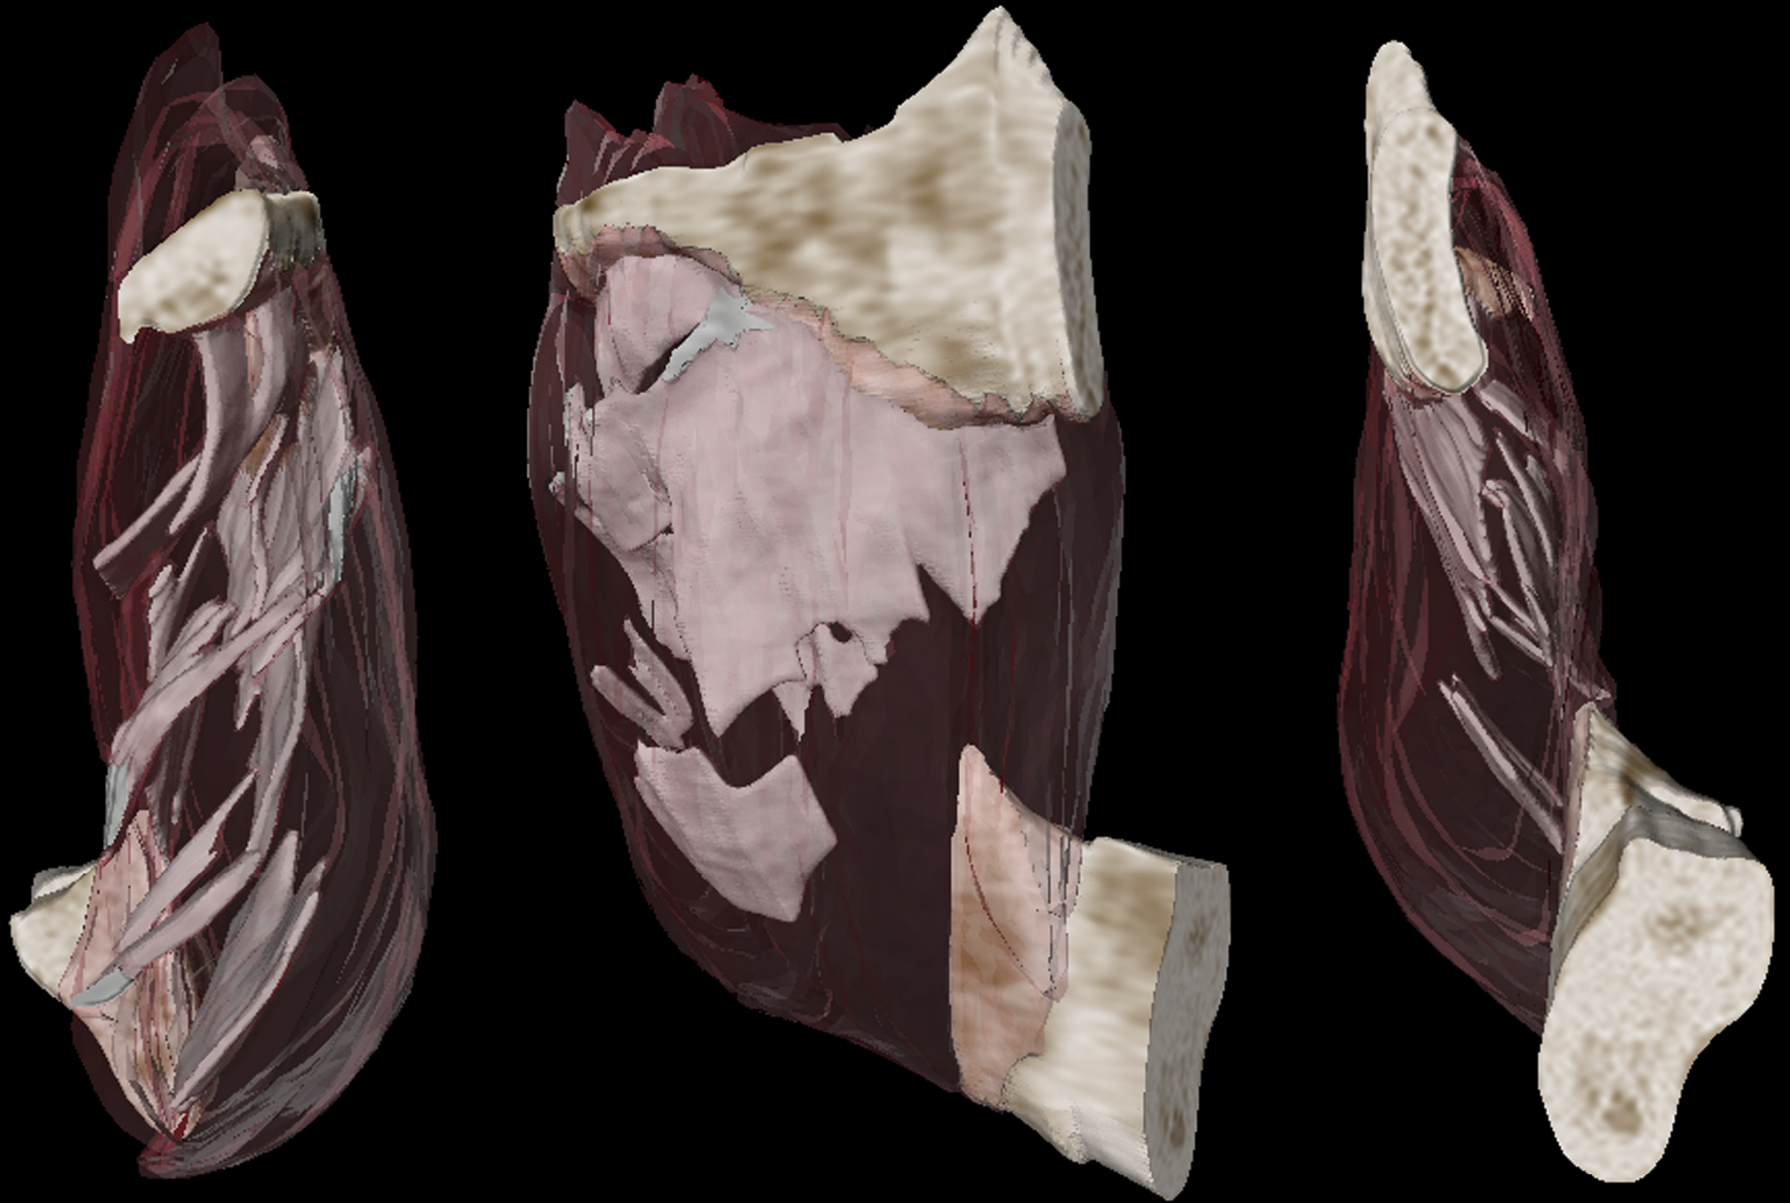

Participant ID: #3  
Age: 30.0 years  
Male



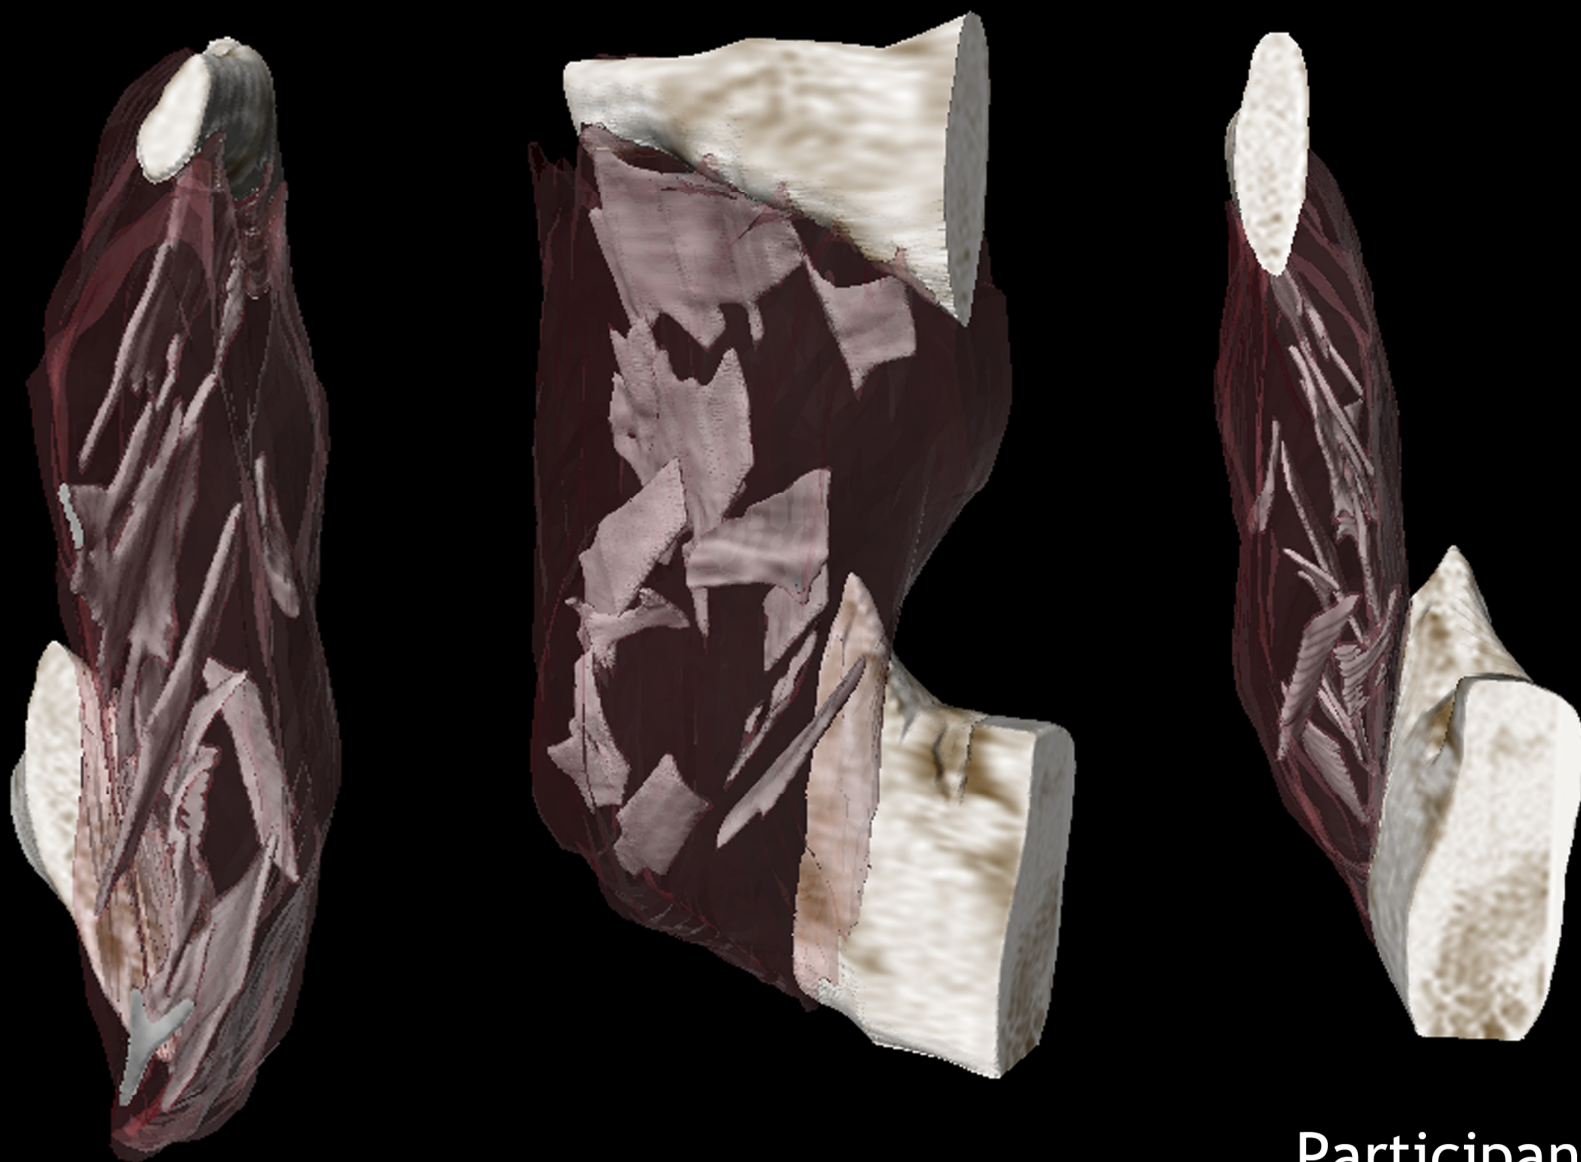

Participant ID: #4  
Age years: 22.0  
Male



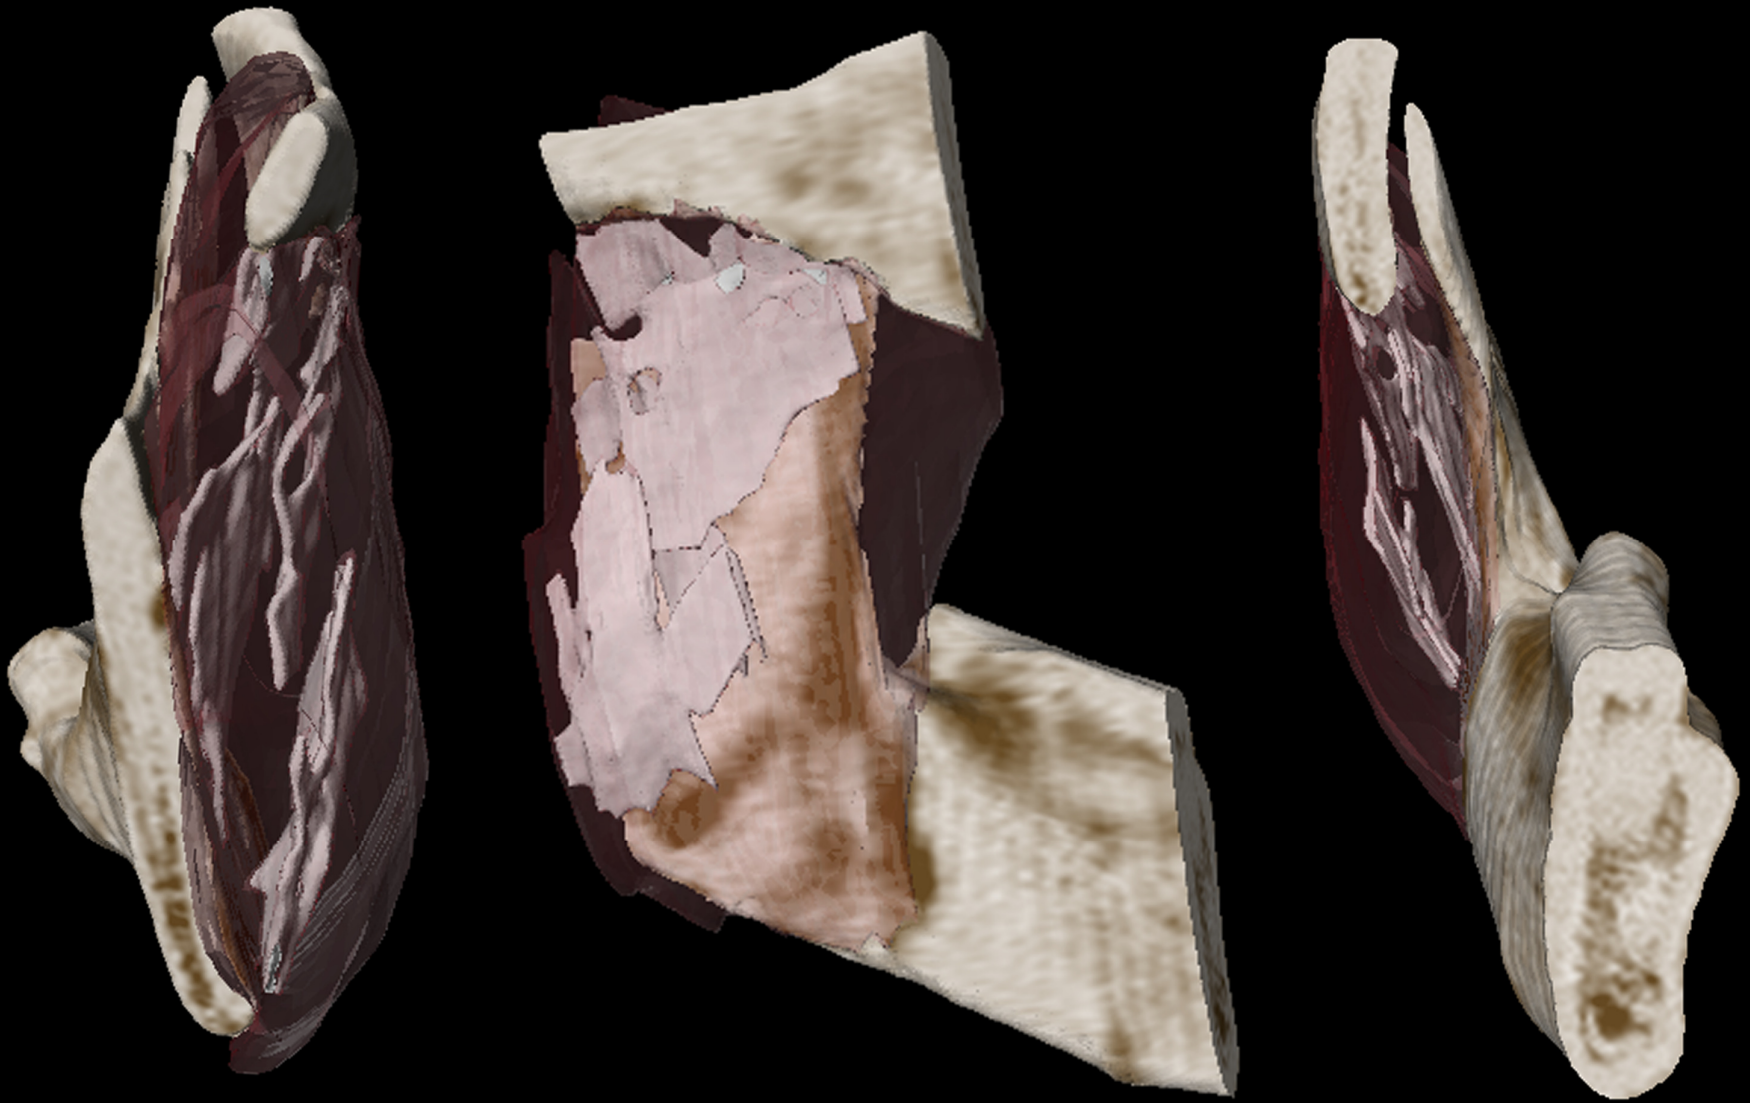

Participant ID: #5  
Age: 25.7 years  
Male

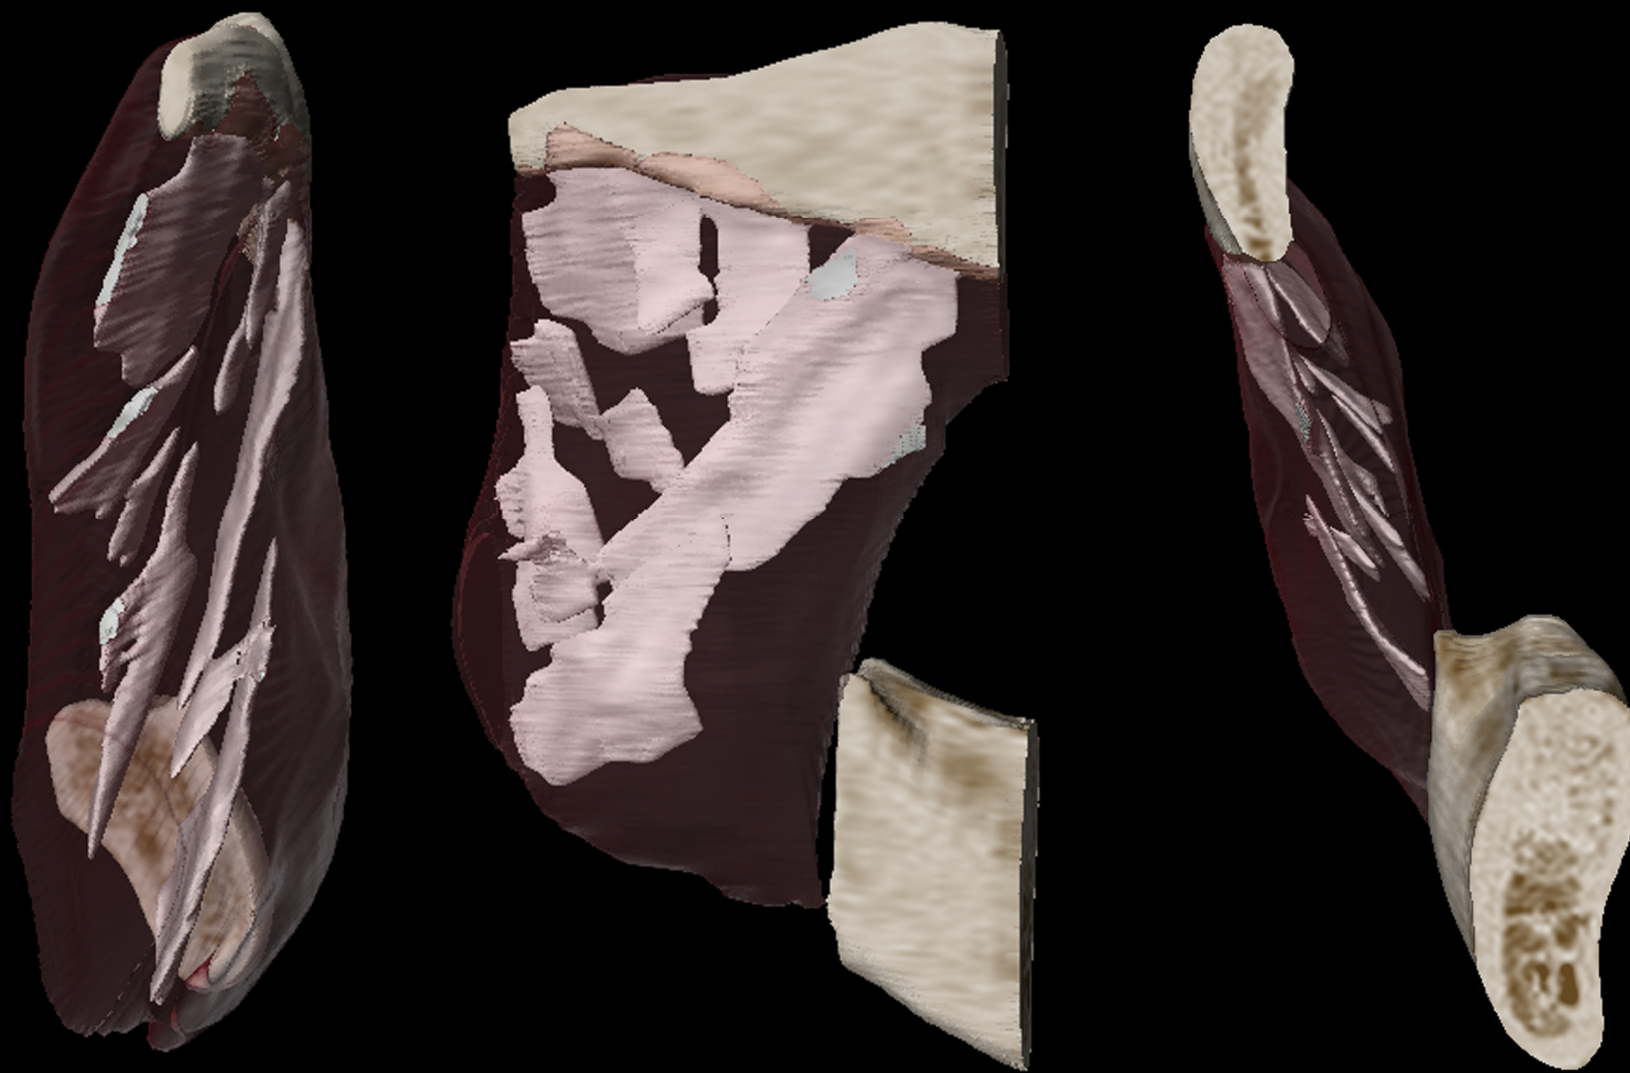

Participant ID: #6  
Age: 27.5 years  
Male

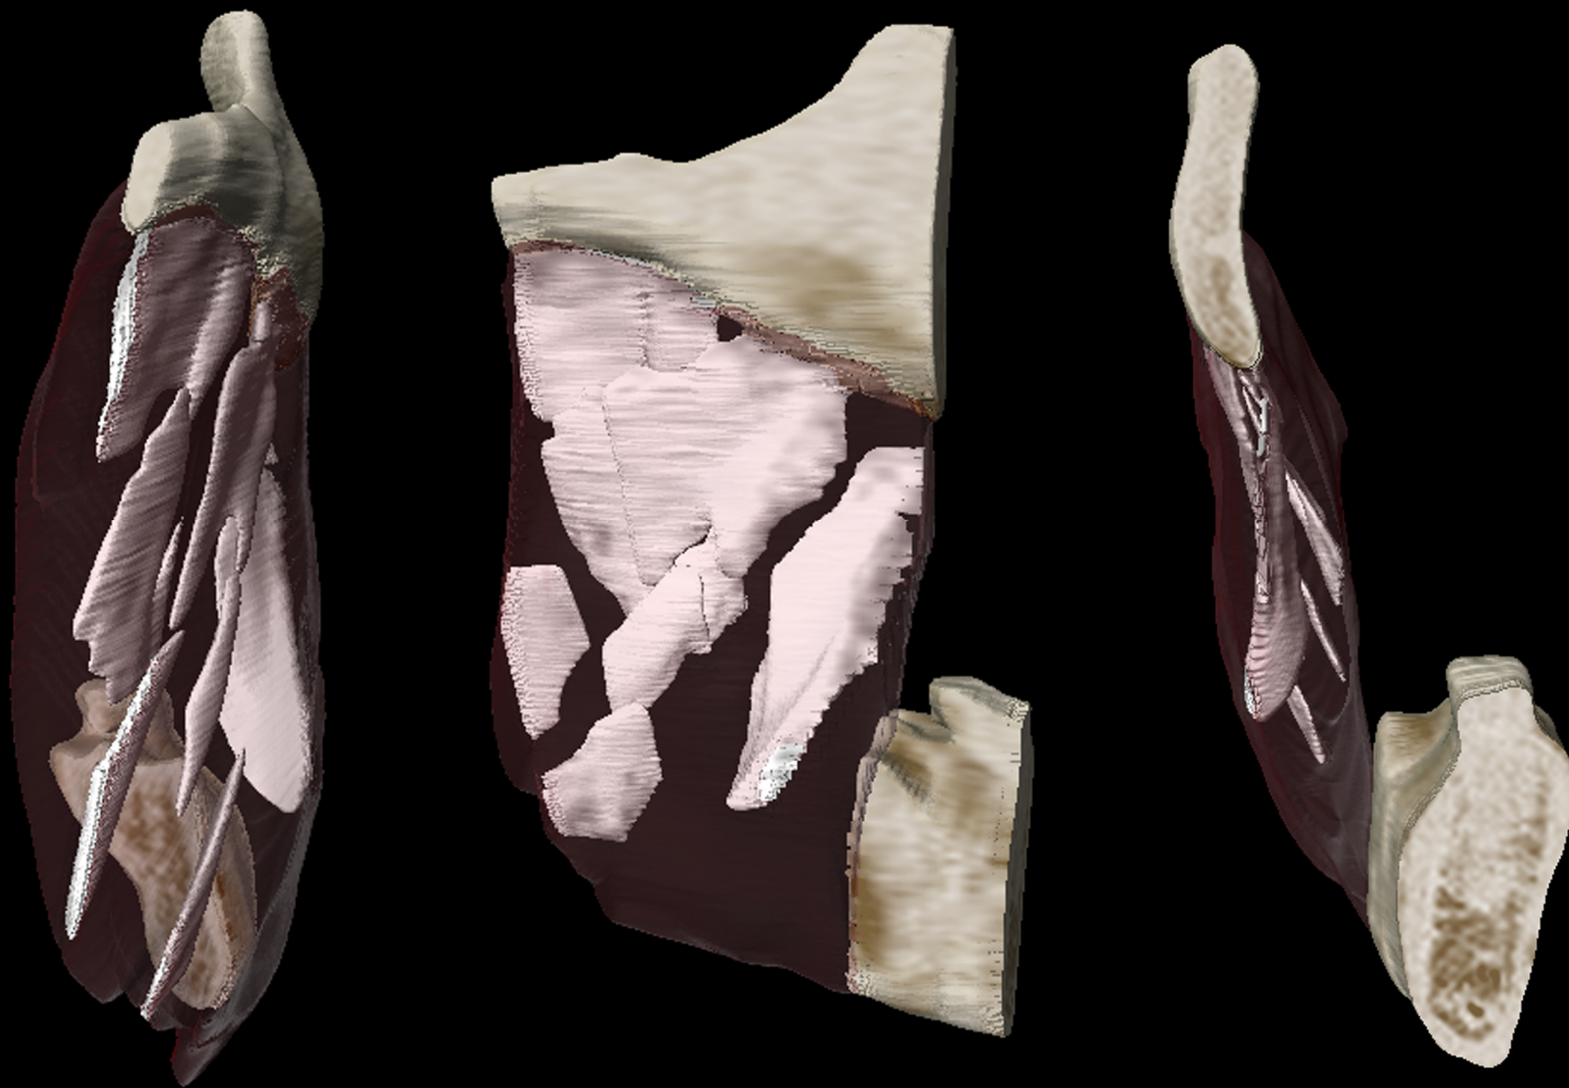

Participant ID: #7  
Age: 26.3 years  
Male



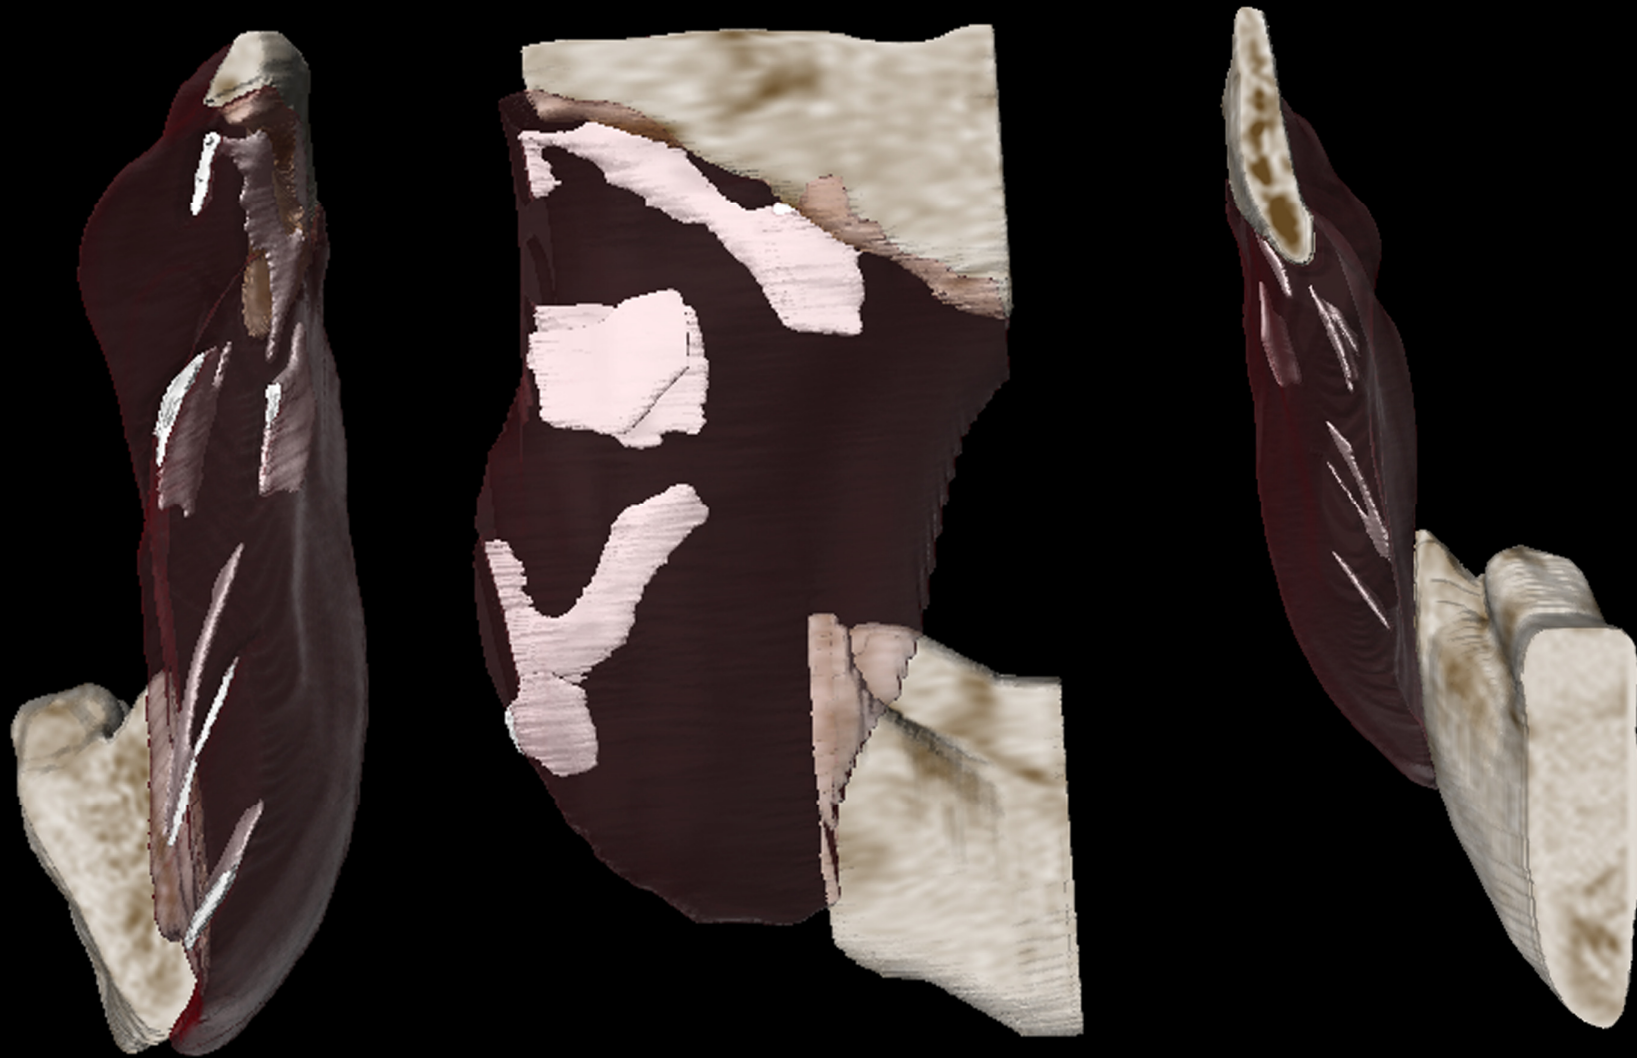

Participant ID: #8  
Age: 24.0 years  
Female

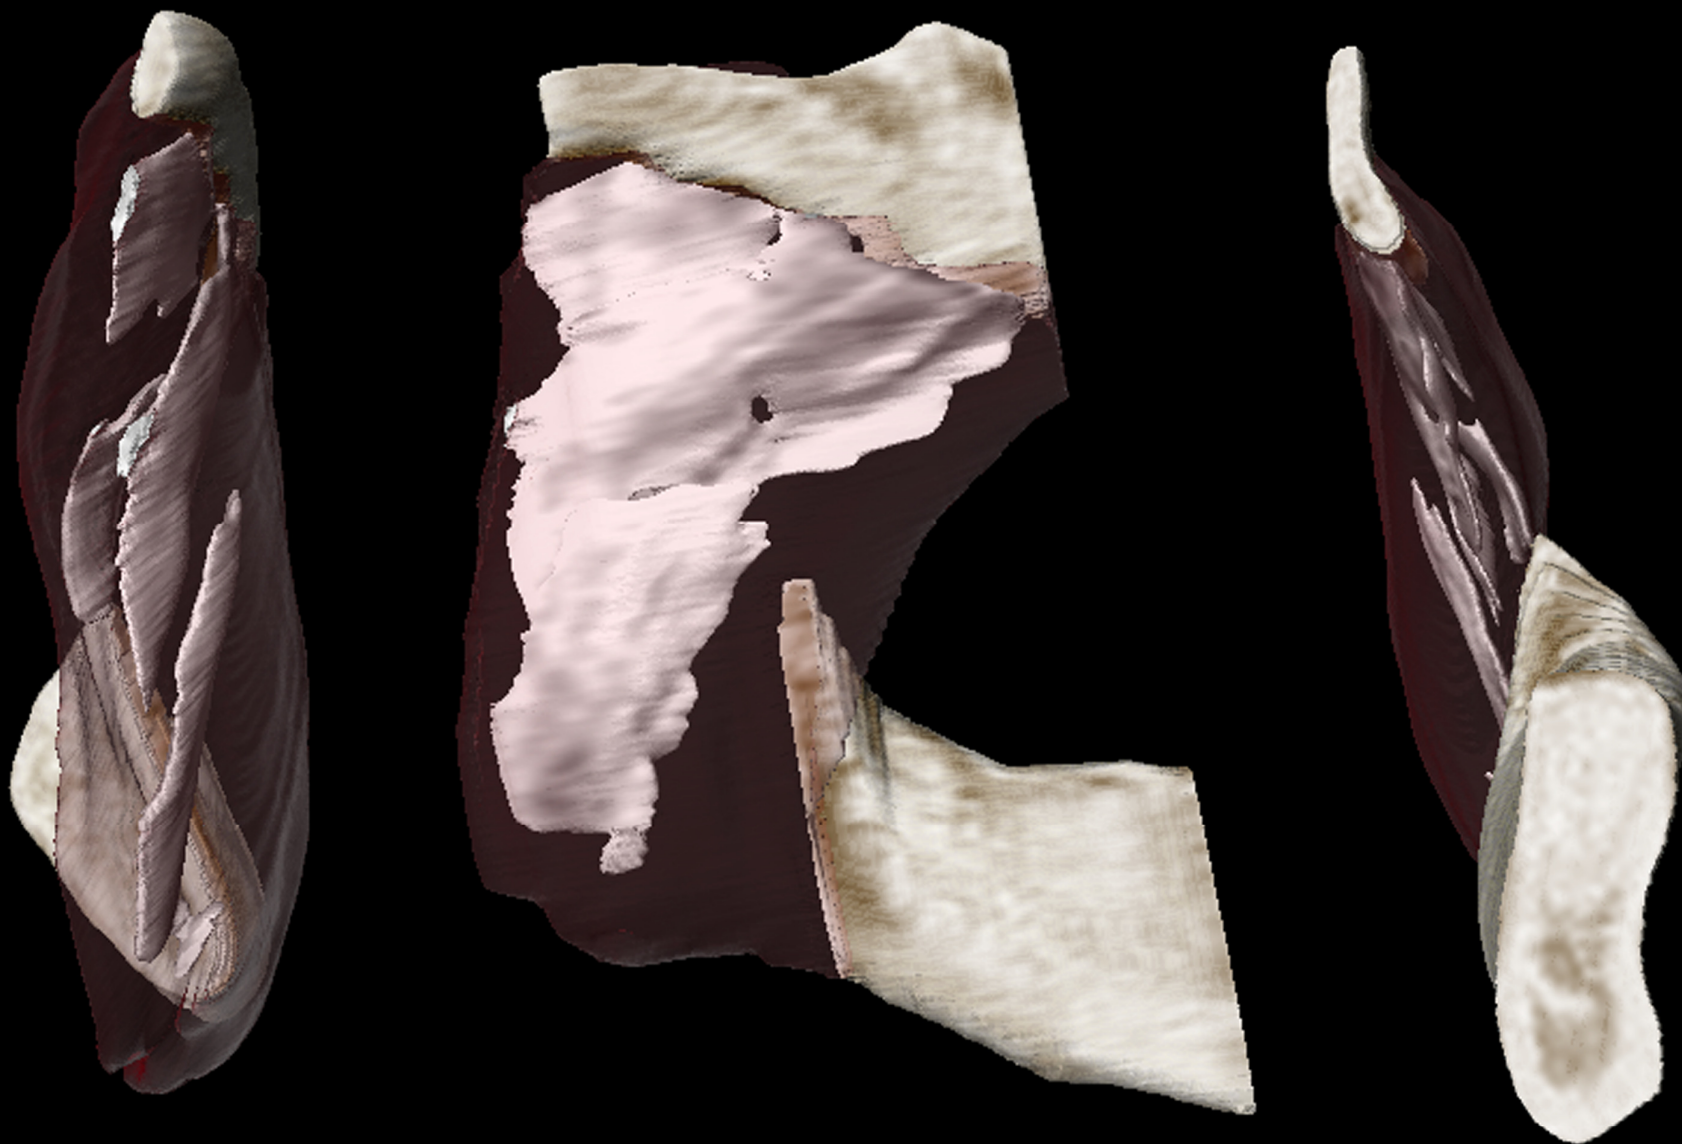

Participant ID: #9  
Age: 25.7 years  
Female

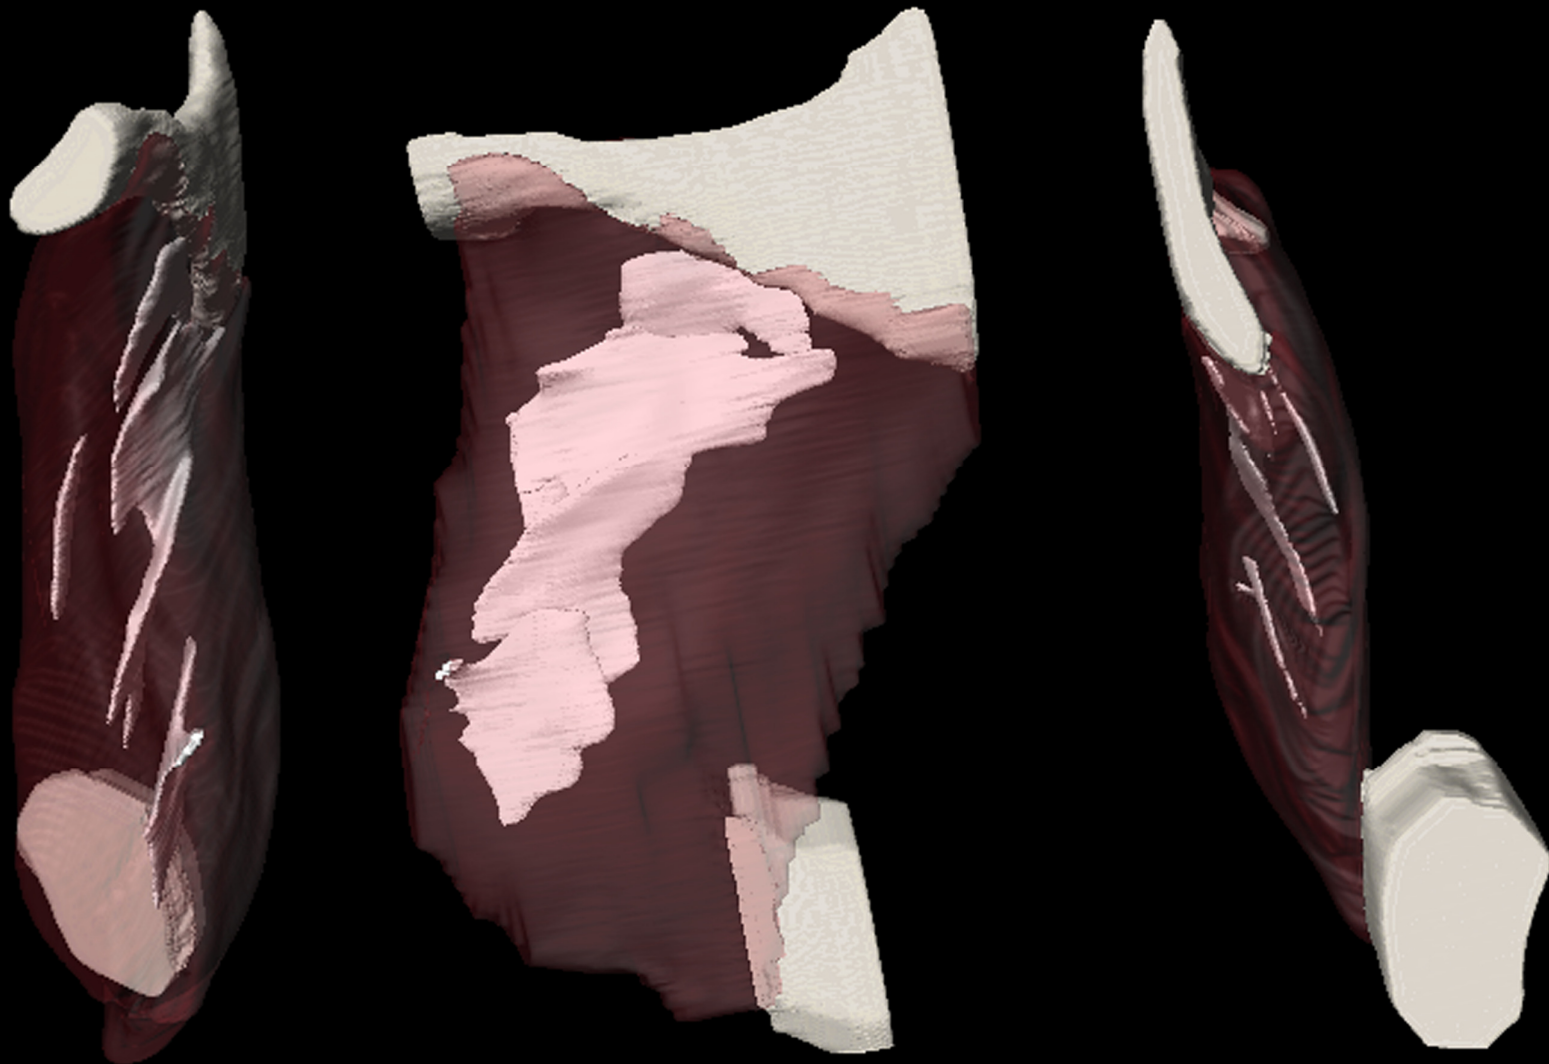

Participant ID: #10  
Age: 21.3 years  
Female



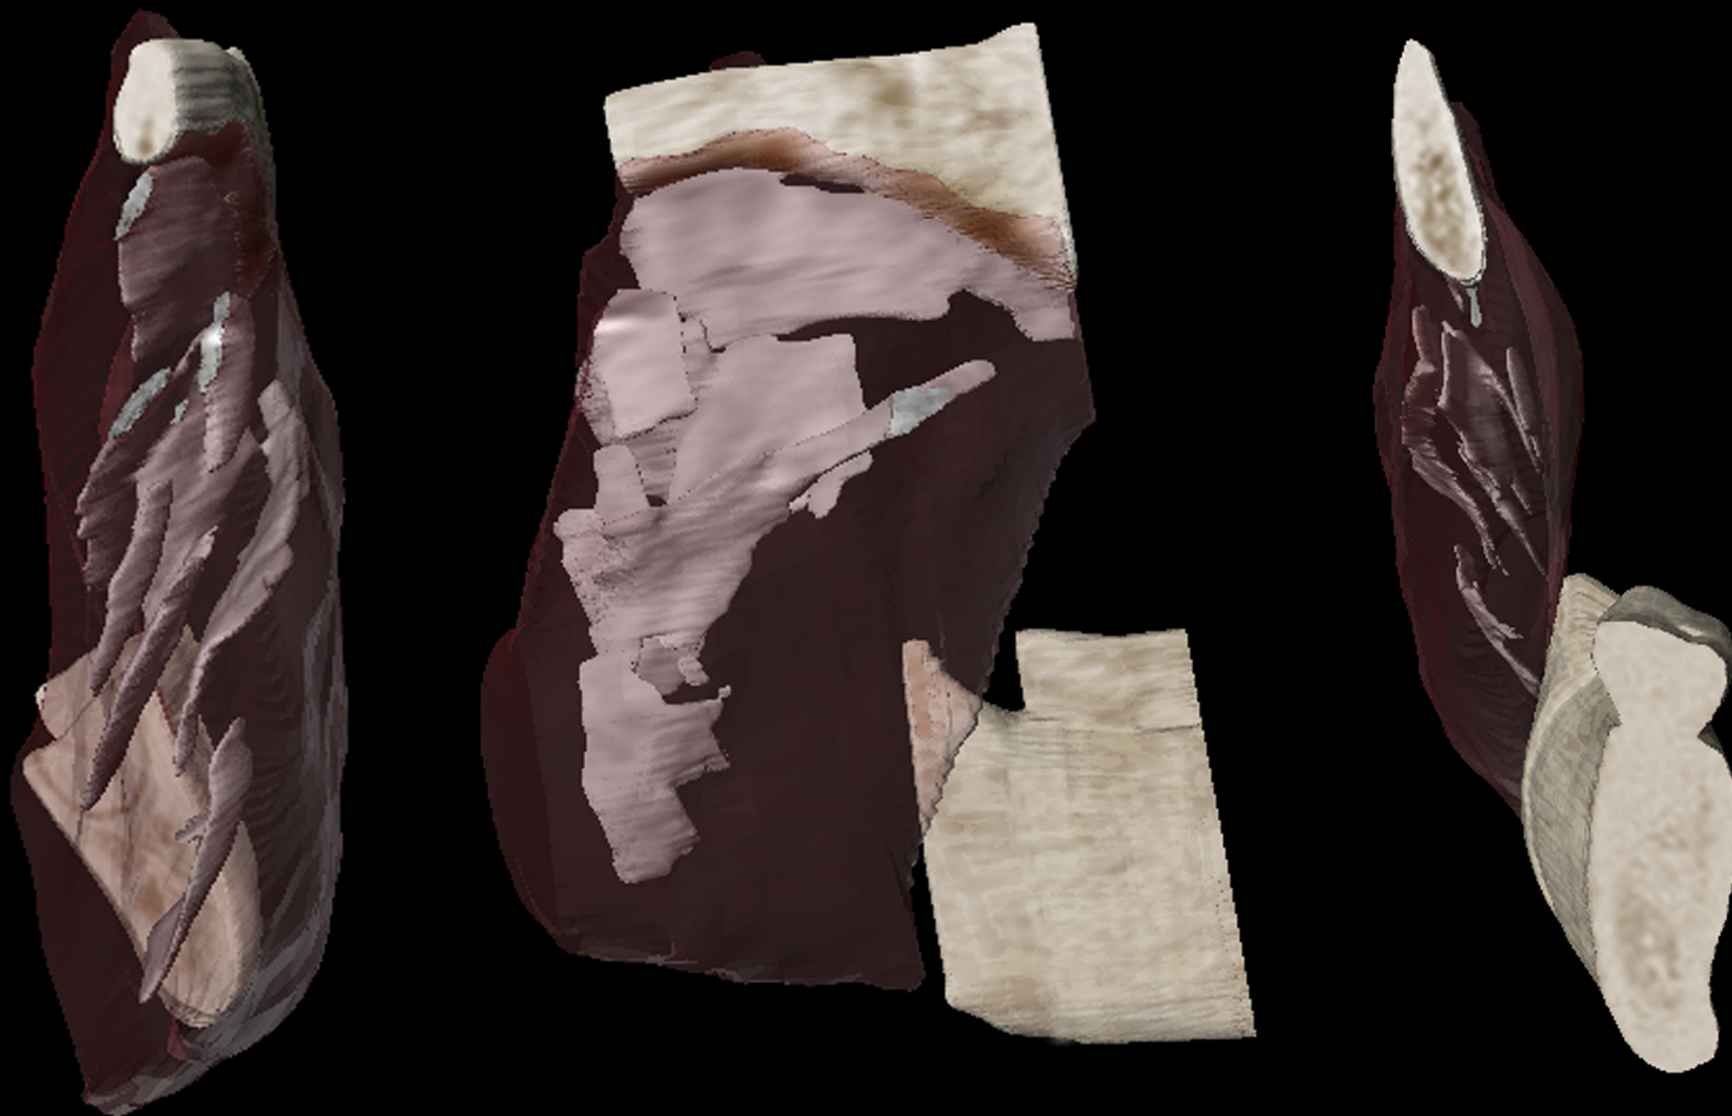

Participant ID: #11  
Age: 27.0 years  
Female

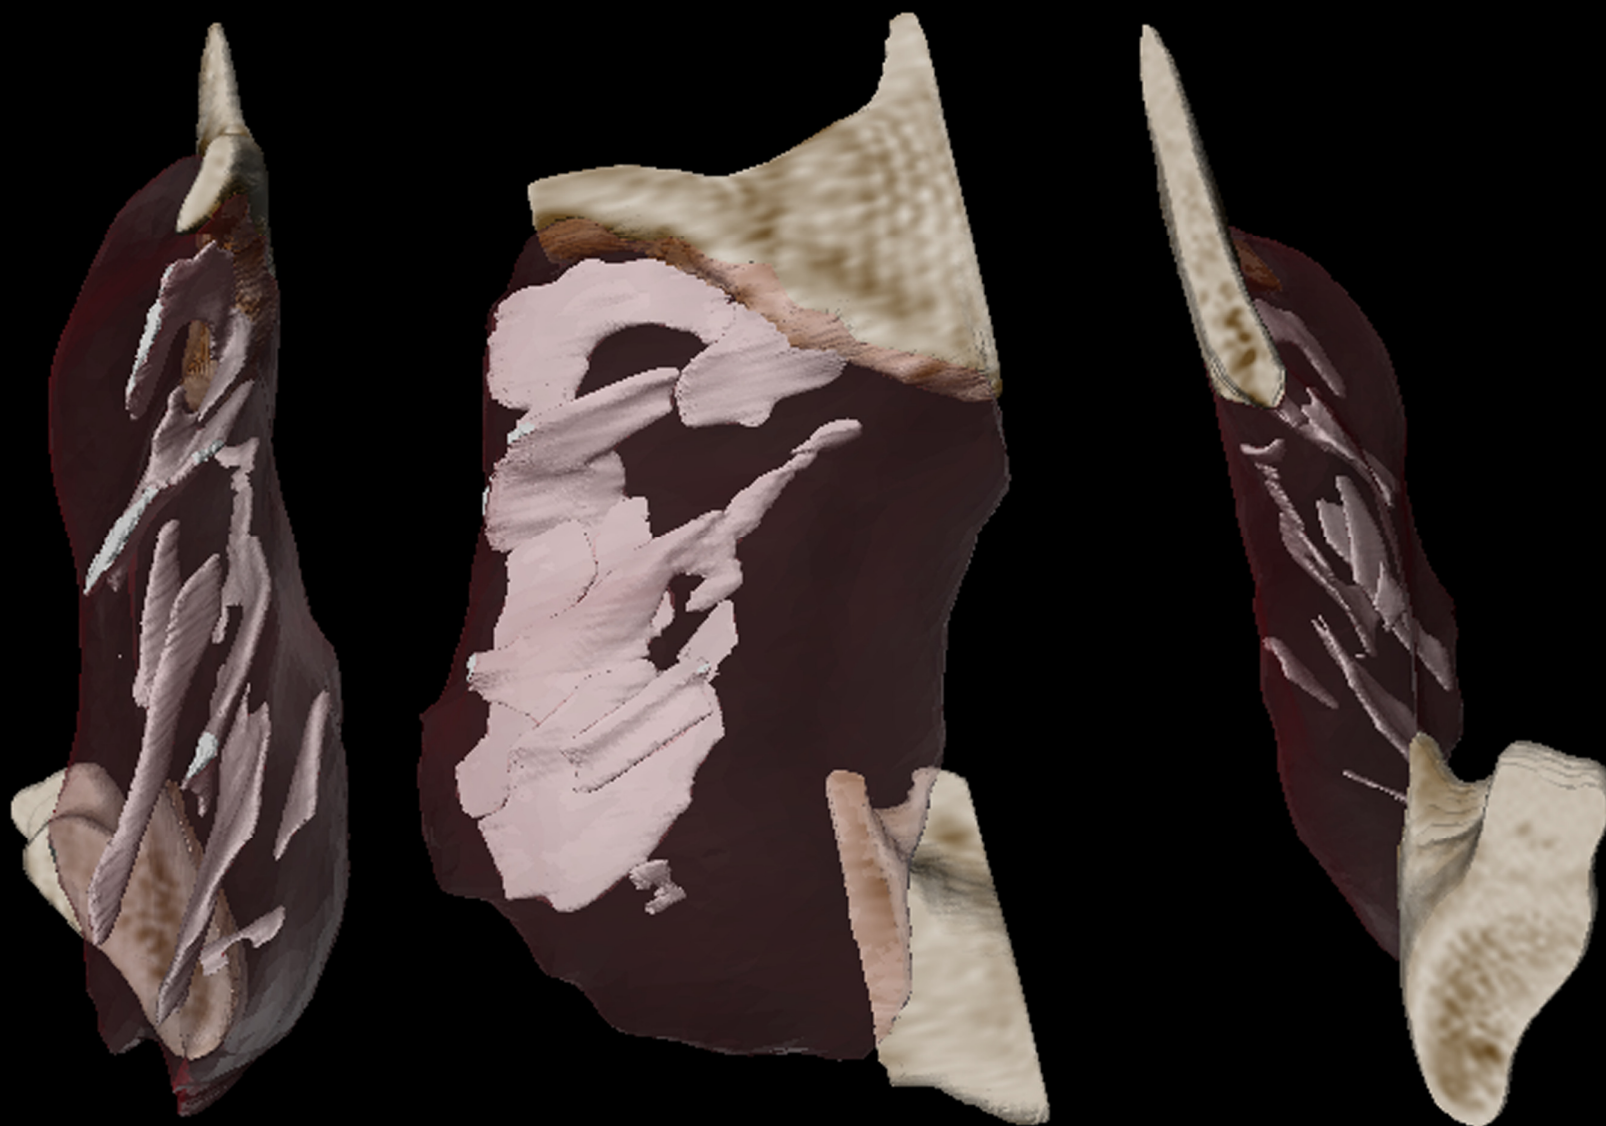

Participant ID: #12  
Age: 28.7 years  
Female

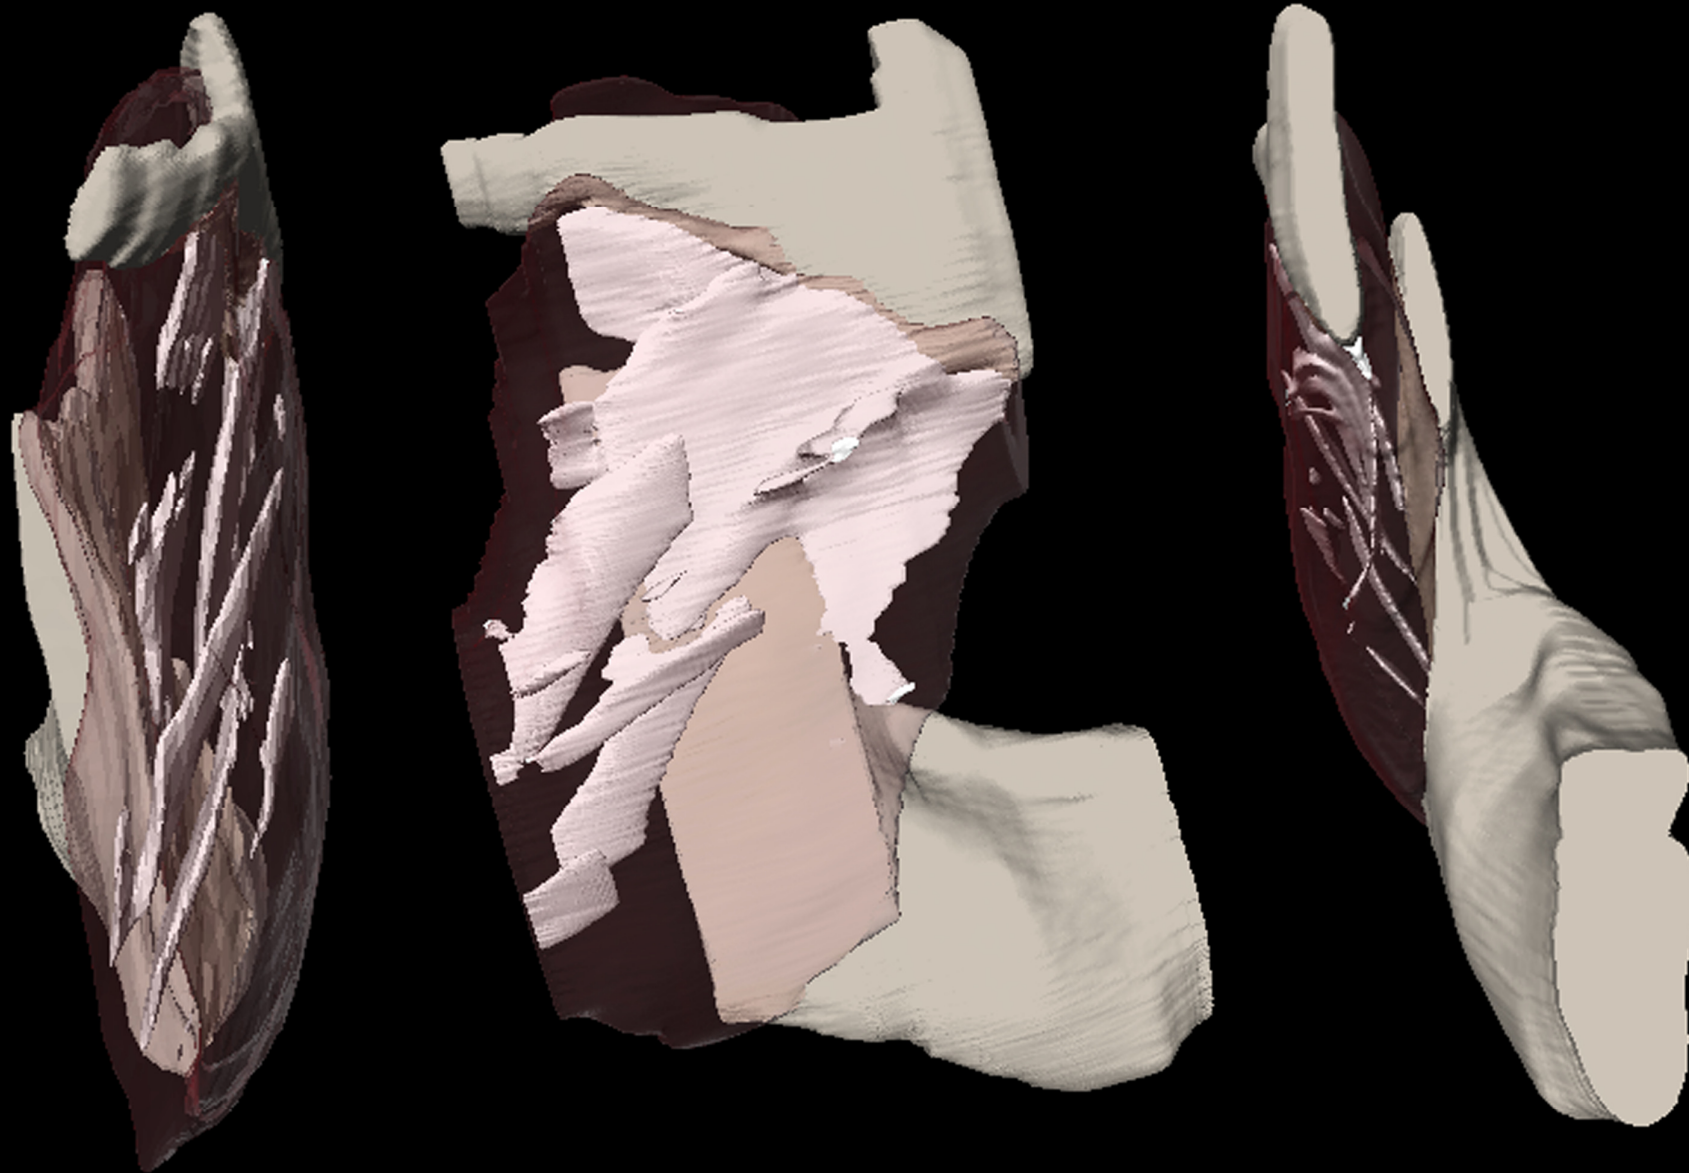

Participant ID: #13  
Age: 24.3 years  
Female



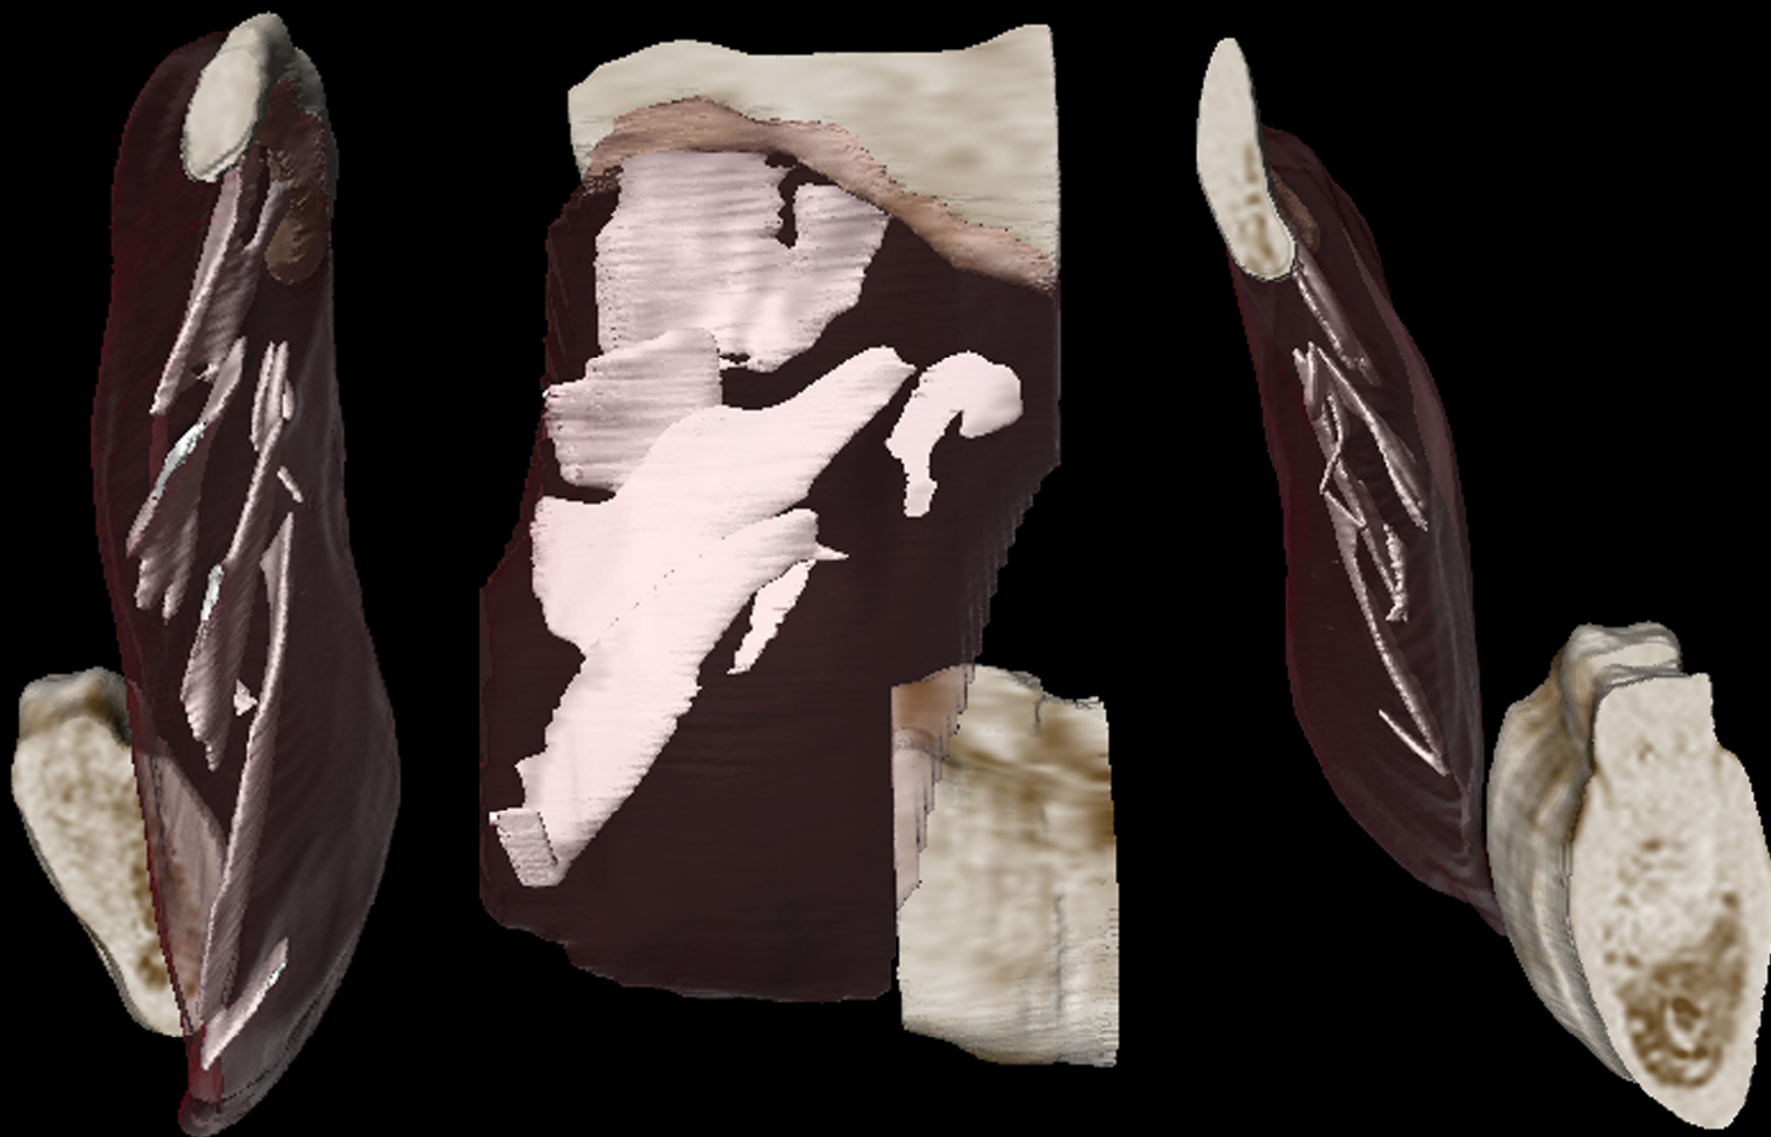

Participant ID: #14  
Age: 28.8 years  
Female
